# Supplementary material for: The Synthesis of a Covalent Organic Framework from Thiophene Armed Triazine and EDOT and Its Application as Anode Material in Lithium-Ion Battery
Source: MDPI journal article supplement (doi:10.3390/polym13193300), 2021-09-27
Supplement: s1 [file s1]

# Supplementary Material: The Synthesis of a Covalent Organic Framework from Thiophene Armed Triazine and EDOT, and Its Composite with Carbon Used as Anode Material in Lithium-ion Battery

Shuang Chen, Shukun Wang, Xin Xue, Jinsheng Zhao, Hongmei Du

## Materials

5,7-bis(trimethylstannyl)-2,3-dihydrothieno[3,4-b][1,4]dioxine (2SnEDOT) was purchased from SunaTech Inc (Suzhou, China). 5-bromothiophene-2-carbonitrile (BTCN) was purchased from Zhengzhou Alfa Chemical Co., Ltd (Zhengzhou, China). Bis(triphenylphosphine)palladium ( $\text{PdCl}_2(\text{PPh}_3)_2$ ), Vulcan XC-72 carbon, Tetrabutylammonium hexafluorophosphate ( $\text{TBAPF}_6$ , 98%), acetonitrile (ACN), 1-methyl-2-pyrrolidinone (NMP, 99.9%), ethanol, acetone, toluene and trifluoromethanesulfonic acid ( $\text{TfOH}$ ) were bought from Aladdin Co., LTD (Shanghai, China). All reactants are of analytical grade and used without further purification.

## Characterization Techniques

The FT-IR measurements were recorded on a Nicolet Avatar 360 FT-IR spectrometer with KBr pellets. The UV-Vis absorption spectroscopy was recorded on Varian Carry 5000 spectrophotometer (Agilent Technologies Ltd, Mulgrave, Australia). The morphologies of the samples were observed by Hitachi Su-70 scanning electron microscopy (SEM, Hitachi Inc., Tokyo, Japan). The specific surface areas and porosity properties were examined by Nitrogen isotherm adsorption-desorption at 77.3 K using ASAP 2460-3 (Micromeritics) volumetric adsorption analyzer (Micromeritics, USA). X-ray photoelectron spectroscopy (XPS) was conducted with ESCALAB 250Xi spectrometer (Thermo Fisher Scientific, Waltham, MA, USA). X-ray diffraction (XRD) was carried out with the  $2\theta$  range from 5 to  $80^\circ$  using Kigaku D/max 2500 X-ray advance diffractometer with a Cu-K $\alpha$  radiation (Rigaku Corporation, Tokyo, Japan), and a step scan mode was adopted with a scanning step of  $0.02^\circ$ . The thermogravimetric analysis of the samples were conducted on a Netzsch STA449C TG/DSC thermal analyzer (TGA, TG, NETZSCH Scientific Instruments Trading Ltd., Germany) under nitrogen atmosphere between 20  $^\circ\text{C}$  and 800  $^\circ\text{C}$ .

## Electrochemical Measurements

The electrochemical performances of the anode composites were tested with CR2032-type coin cells. A mixture is obtained by mixing the active material, acetylene black and polyvinylidene fluoride (PVDF) at a mass ratio of 6: 2.5: 1.5. The moderate amount of NMP was added to the mixture, be grinded thoroughly to form a homogeneous slurry, and the slurry was then coated on copper foils. The coated copper foil was dried at 60  $^\circ\text{C}$  for 24 h, and then be cut into slices as the working electrode (anode for LIBs). The slices are further dried in vacuum drier at 120  $^\circ\text{C}$  for 8 hours, the constant weight of a slice was about 9 mg with the diameter of 12 mm. Then the as-prepared electrode was paired with Li foil as the counter electrode and the half battery was assembled in an argon-filled glove box. The electrolyte used was the solution of 1 M  $\text{LiPF}_6$  dissolved in ethylene carbonate (EC) and dimethyl carbonate (DMC) (1:1 v/v) mixture. Galvanostatic charge-discharge experiments and rate capability were carried out on a land battery testing system (Land CT2001A, Wuhan, China) at room temperature. The same configured cells were also subject to cyclic voltammetry (CV) and electrochemical impedance spectroscopy (EIS) measurements on a potentiostat (PGSTAT 302N, Metrohm) (Metrohm, Herisau, Switzerland).

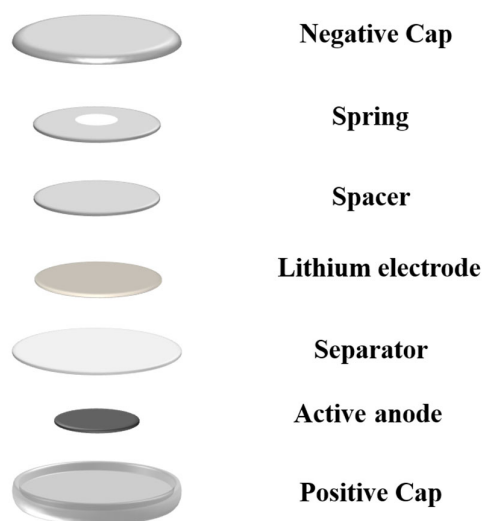

**Figure S1.** The schematic diagram of the coin-type battery.

**Table S1.** The performance of some CTFs@C composites as anode materials for LIBs.

| Name    | $C_n$ (mA h g <sup>-1</sup> )<br>cycle number | Electrochemical window<br>(V) | Electrode composition<br>(AM:CA:B)[wt%] | Addition | Binder | Ref       |
|---------|-----------------------------------------------|-------------------------------|-----------------------------------------|----------|--------|-----------|
| PTT-1@C | 495, 300                                      | 0-3 V                         | 6:2.5:1.5                               | AB       | PVDF   | 21        |
| PTT-2@C | 671, 300                                      | 0-3 V                         | 6:2.5:1.5                               | AB       | PVDF   | 21        |
| PTT-3@C | 707, 300                                      | 0-3 V                         | 6:2.5:1.5                               | AB       | PVDF   | 21        |
| PTT-4@C | 772, 300                                      | 0-3 V                         | 6:2.5:1.5                               | AB       | PVDF   | 21        |
| PTT-O/C | 645, 300                                      | 0-3 V                         | 6:2.5:1.5                               | AB       | PVDF   | this work |

$C_n$  (mA h g<sup>-1</sup>): the specific capacity at determined cycle; AM, active material; CA, carbon additive; B, binder. AB, acetylene black; PVDF, poly(vinylidene fluoride).
